# Supplementary material
Source: publisher figshare collection journal article supplement (https://gsapubs.figshare.com/ndownloader/files/23293277)
Supplement: Supplementary file 1 [file 23293277]

**Chronologic distribution of ACEX lithological units according to Backman et al. (2008)**  
**[Backman, J., and 13 others , 2008, Age model and core-seismic integration for the Cenozoic Arctic Coring Expedition sediments from the Lomonosov Ridge: Paleoceanography, v. 23, p. PA1S03, doi:10.1029/2007PA001476.].**

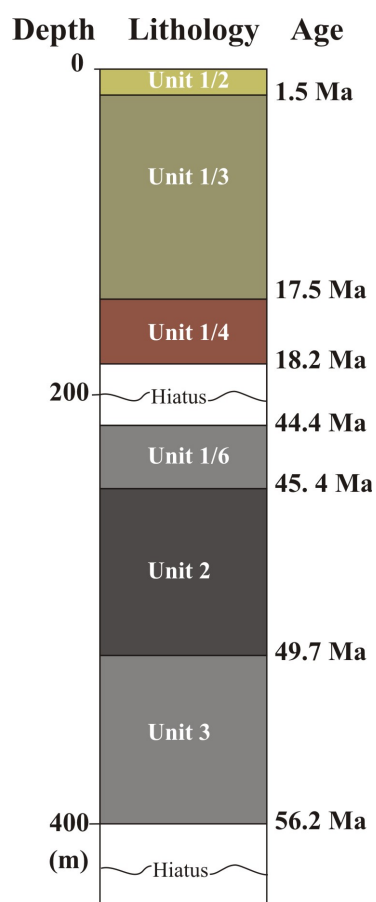

The sediments of Unit 1 and Unit 3 are composed of silty clay. The lithology of Unit 2 corresponds to the mud bearing biosiliceous ooze.
